# Supplementary material for: Detection of Intra-Tumor Self Antigen Recognition during Melanoma Tumor Progression in Mice Using Advanced Multimode Confocal/Two Photon Microscope
Source: PubMed Central journal article supplement (PMC3120835; doi:10.1371/journal.pone.0021214), 2011-06-22

**A****Absolute Number of Tumor Infiltrating Pmel-1 T cells**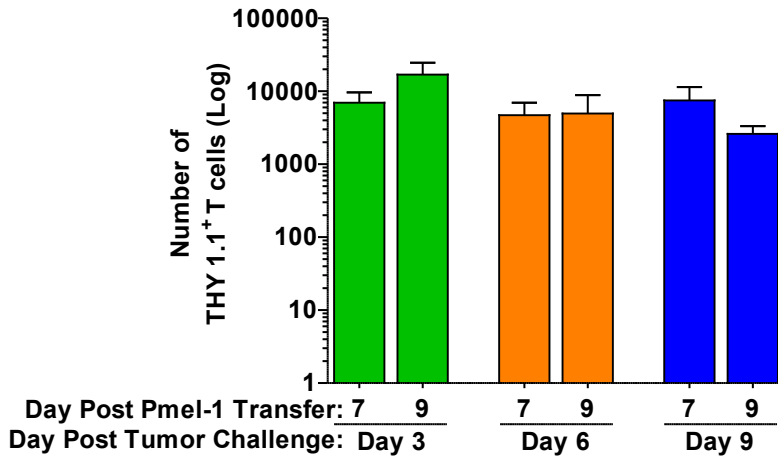**B**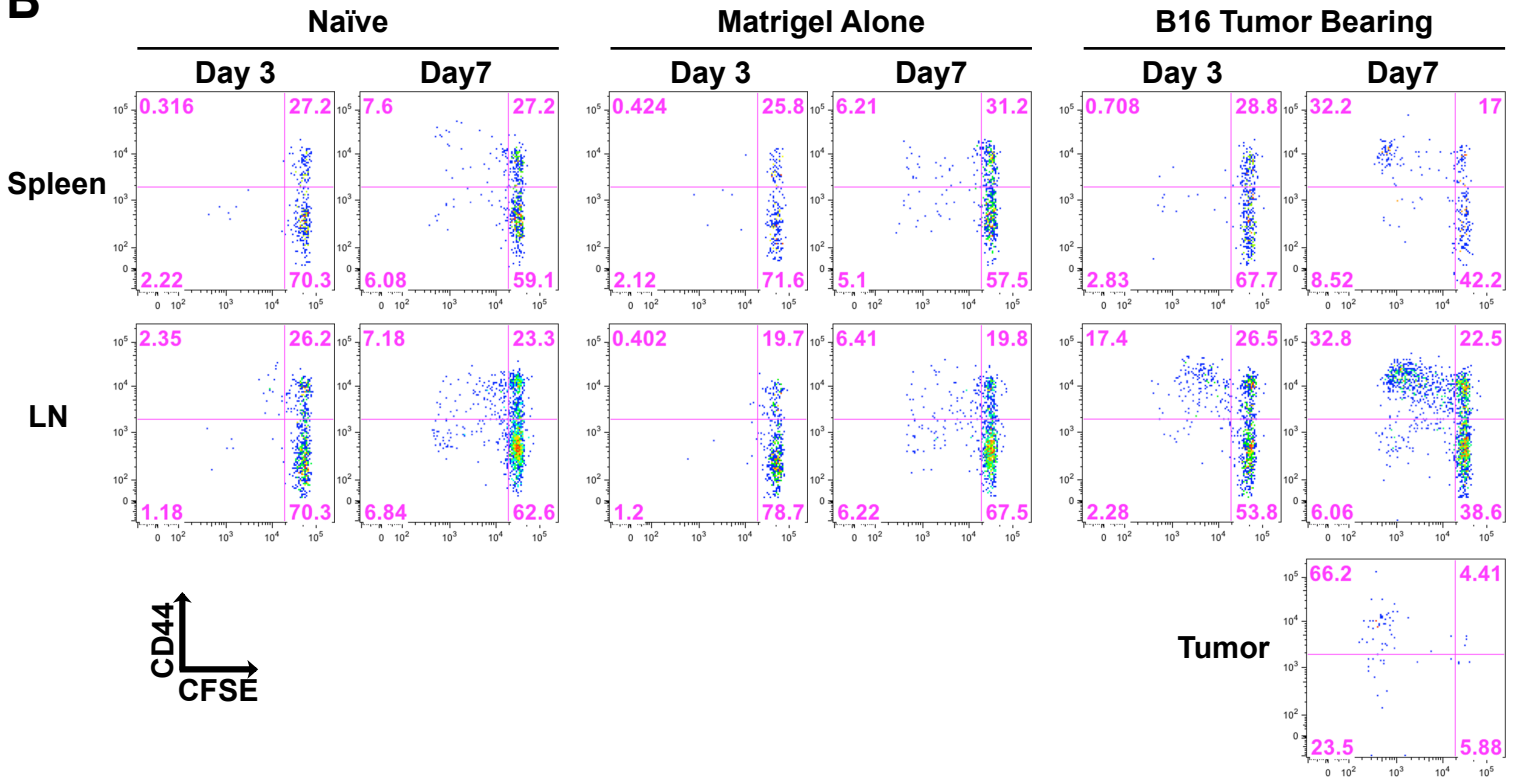

Supplement: pone.0021214.s001.pdf [file pone.0021214.s001.pdf]
