# Supplementary material for: Detection of Intra-Tumor Self Antigen Recognition during Melanoma Tumor Progression in Mice Using Advanced Multimode Confocal/Two Photon Microscope
Source: PubMed Central journal article supplement (PMC3120835; doi:10.1371/journal.pone.0021214), 2011-06-22

Sup Figure 2

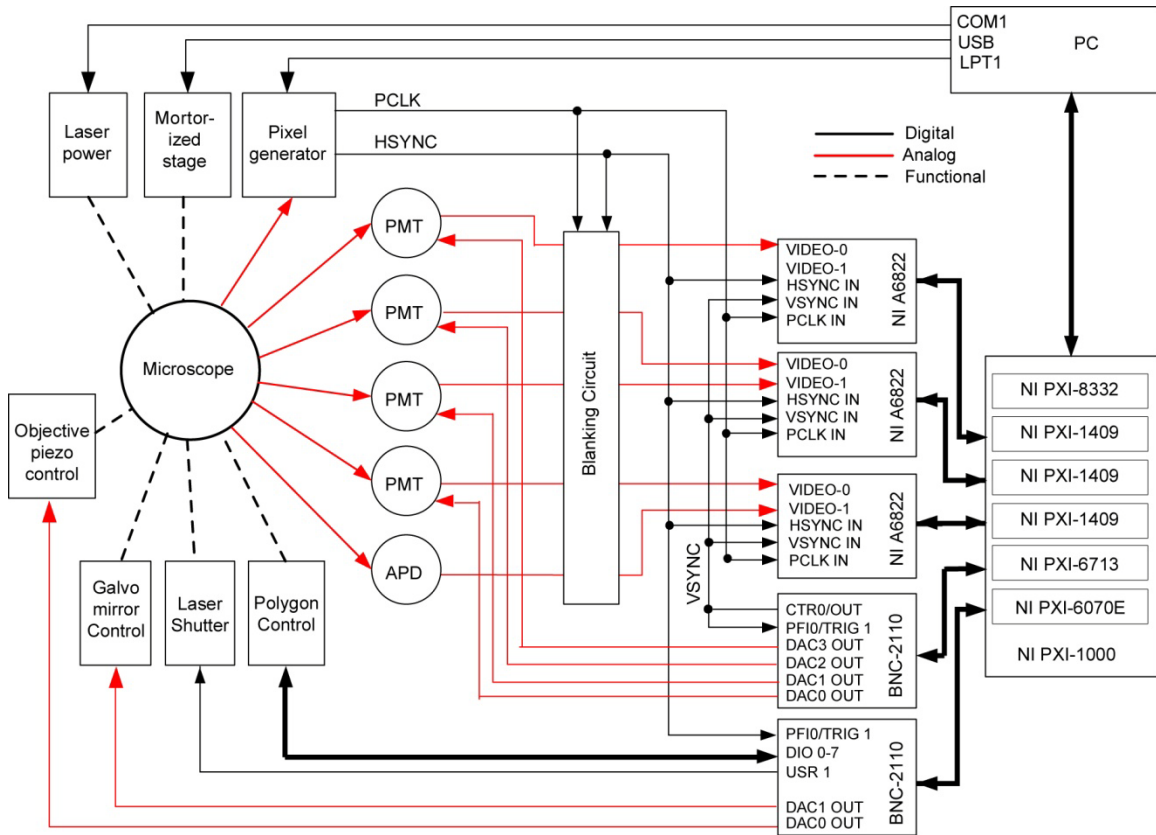

Supplement: pone.0021214.s002.pdf [file pone.0021214.s002.pdf]
