# Supplementary material for: Detection of Intra-Tumor Self Antigen Recognition during Melanoma Tumor Progression in Mice Using Advanced Multimode Confocal/Two Photon Microscope
Source: PubMed Central journal article supplement (PMC3120835; doi:10.1371/journal.pone.0021214), 2011-06-22

### Sup Figure 3

**A**

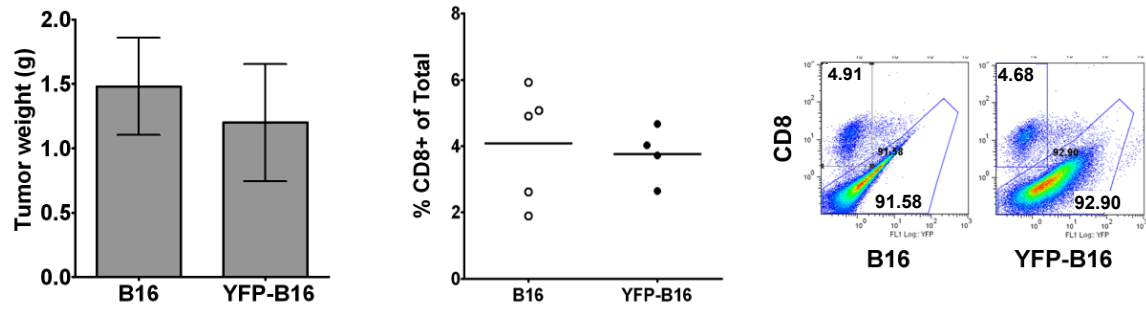

**B**

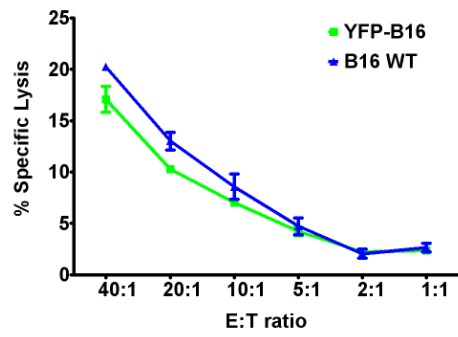

Supplement: pone.0021214.s003.pdf [file pone.0021214.s003.pdf]
