# Supplementary material for: Detection of Intra-Tumor Self Antigen Recognition during Melanoma Tumor Progression in Mice Using Advanced Multimode Confocal/Two Photon Microscope
Source: PLOS journal article supplement (doi:10.1371/journal.pone.0021214), 2011-06-22

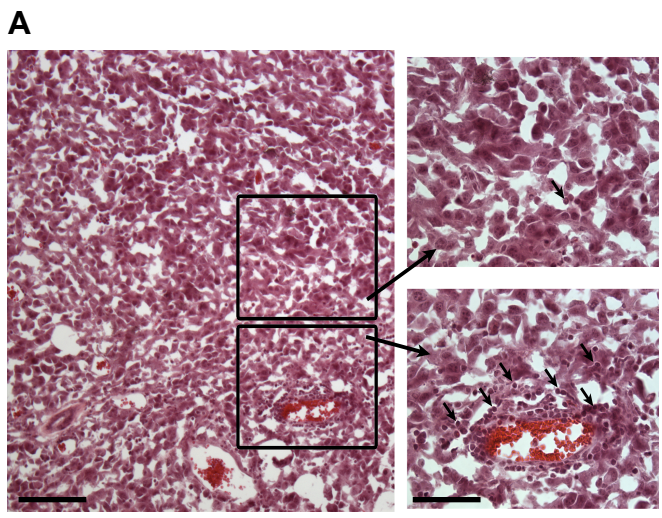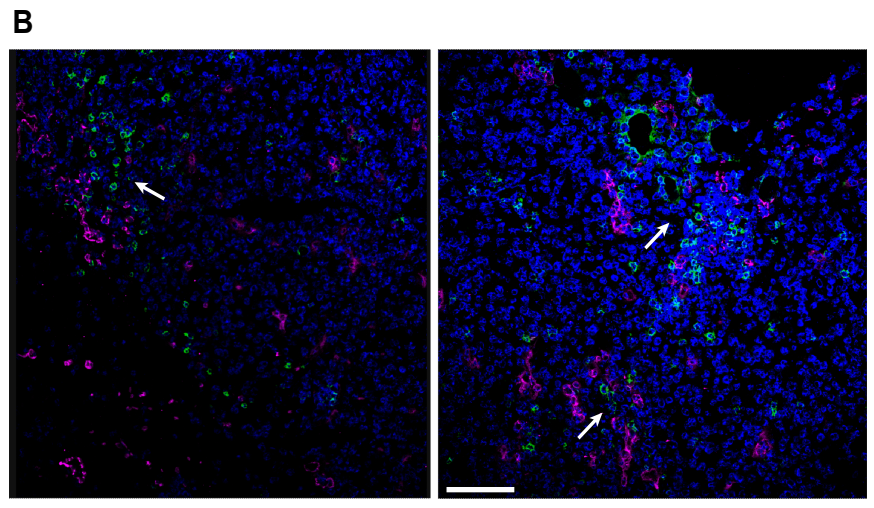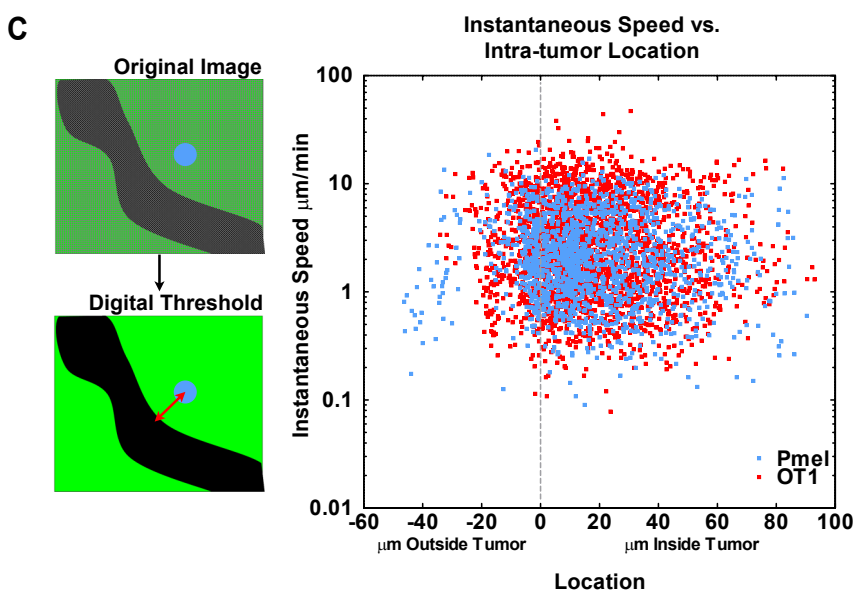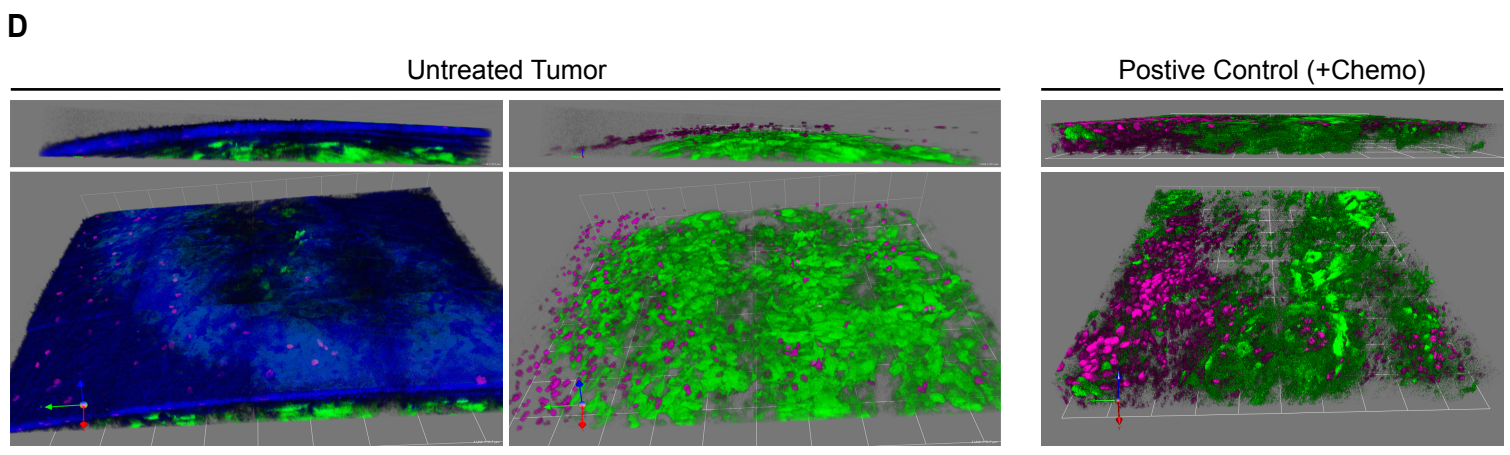

Supplement: S4 (10.1371/journal.pone.0021214.s004) [file journal.pone.0021214.s004]
